# Supplementary material
Source: Springer Nature journal article supplement (https://www.springermedizin.de/resource/supplementary/13054_2012_700_MOESM3_ESM.pdf/9709024)

Cumulative survival

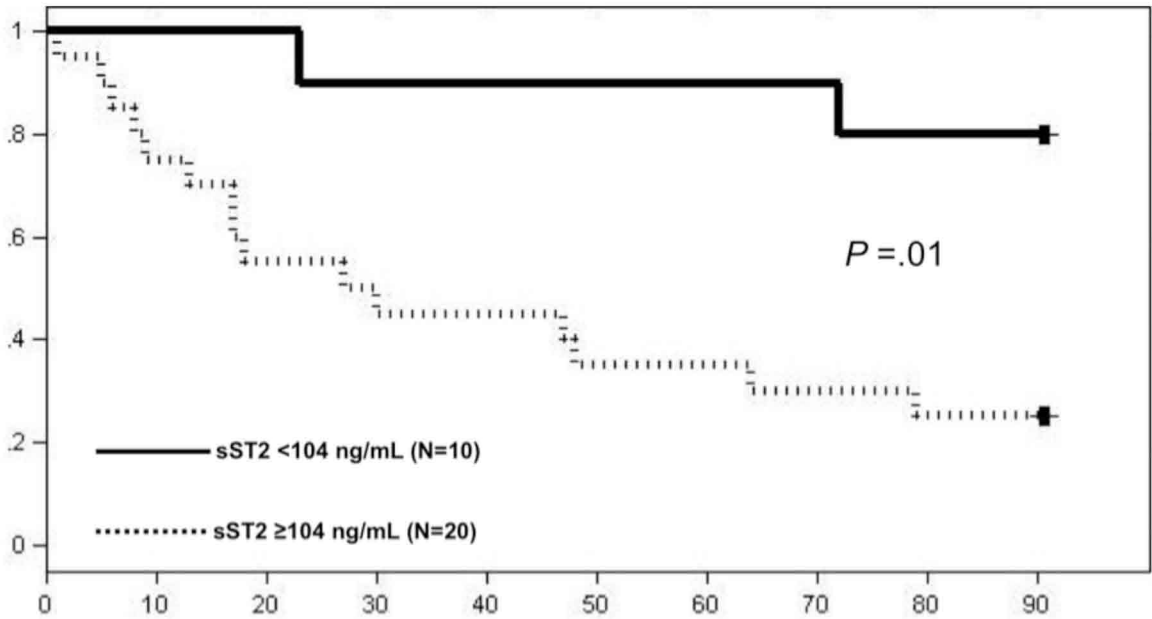

Days from Admission to Cardiac Intensive Care Unit

Supplement: MOESM3 [file 9709024]
